# Supplementary material for: Preparation and properties of polyacrylamide/polyvinyl alcohol physical double network hydrogel
Source: Royal Society of Chemistry journal article supplement (doi:10.1039/c6ra24006b), 2016-01-01
Supplement: c6ra24006b1.pdf [file c6ra24006b1.pdf]

## **Supplementary Information**

### **Preparation and properties of polyacrylamide/polyvinyl alcohol physical physical double network hydrogel**

Yulin Zhang<sup>1</sup>, Mingwei Song<sup>2</sup>, Yongfu Diao<sup>1</sup>, Binwei Li<sup>1</sup>, Linying Shi<sup>1</sup>, Rong Ran<sup>1</sup>

( <sup>1</sup> College of Polymer Science and Engineering, <sup>2</sup> College of Arts

Sichuan University, Chengdu, 610065,

People's Republic of China )

\*Corresponding author. Email address: ranrong@scu.edu.cn

Tel:+86-28-85462890, Fax:+86-28-85462890

## Preparation and properties of polyvinyl alcohol / acrylamide physical double network hydrogel

Table. S1 The feed recipe of the hydrogels

| Gels        | AM(wt%) <sup>a</sup> | SMA(mol%) <sup>b</sup> | SDBS(mol%) <sup>b</sup> | KPS(mol%) <sup>b</sup> | PVA(wt%) <sup>a</sup> |
|-------------|----------------------|------------------------|-------------------------|------------------------|-----------------------|
| HAPAM       | 10                   | 1.5                    | 3                       | 0.1                    | 0                     |
| HAPAM-PVA-1 | 10                   | 1.5                    | 3                       | 0.1                    | 1                     |
| HAPAM-PVA-2 | 10                   | 1.5                    | 3                       | 0.1                    | 2                     |
| HAPAM-PVA-4 | 10                   | 1.5                    | 3                       | 0.1                    | 4                     |
| HAPAM-PVA-6 | 10                   | 1.5                    | 3                       | 0.1                    | 6                     |

<sup>a</sup> relative to deionized water

<sup>b</sup> relative to AM

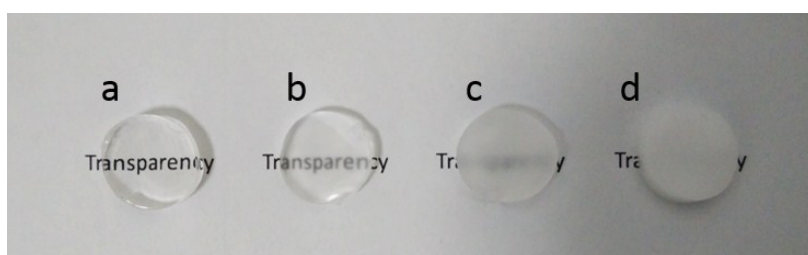

**Fig. S1** Photos of the prepared hydrogels, which has been cut into 2 mm thick slice,: (a) HAPAM, (b) HAPAM/PVA-4, (C) HAPAM/PVA-4-1, (D) HAPAM/PVA-4-3

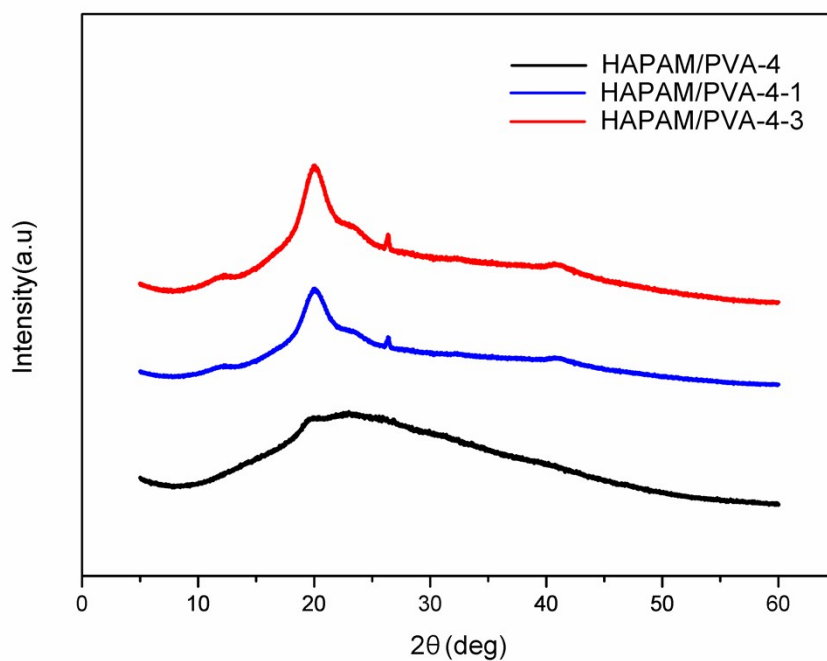

**Fig. S2 XRD patterns of the HAPAM/PVA-4 gels before and after various cycle of freezing/thawing treatment**

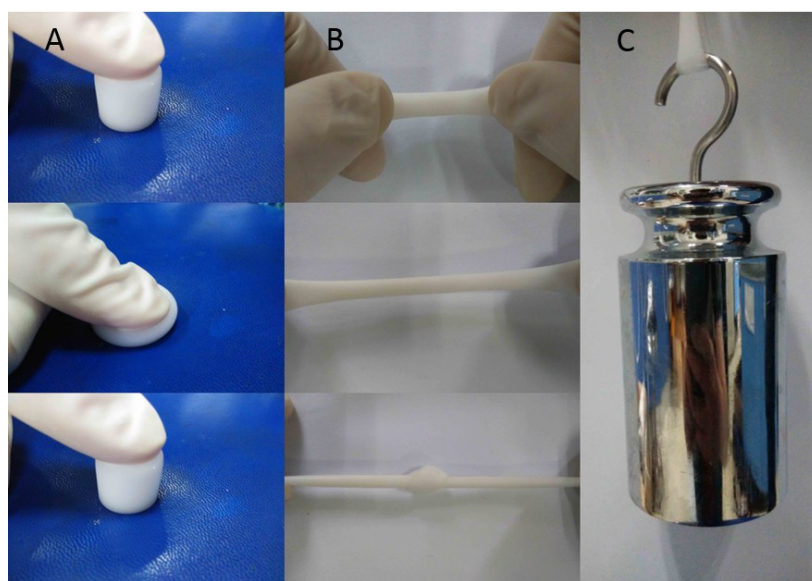

**Fig. S3 Photos of HAPAM/PVA-4-3 exhibiting excellent mechanical performance: (a) compression and recovery (b) Stretching and stretching after being knotted (c) Hanging weight of 2 kg**

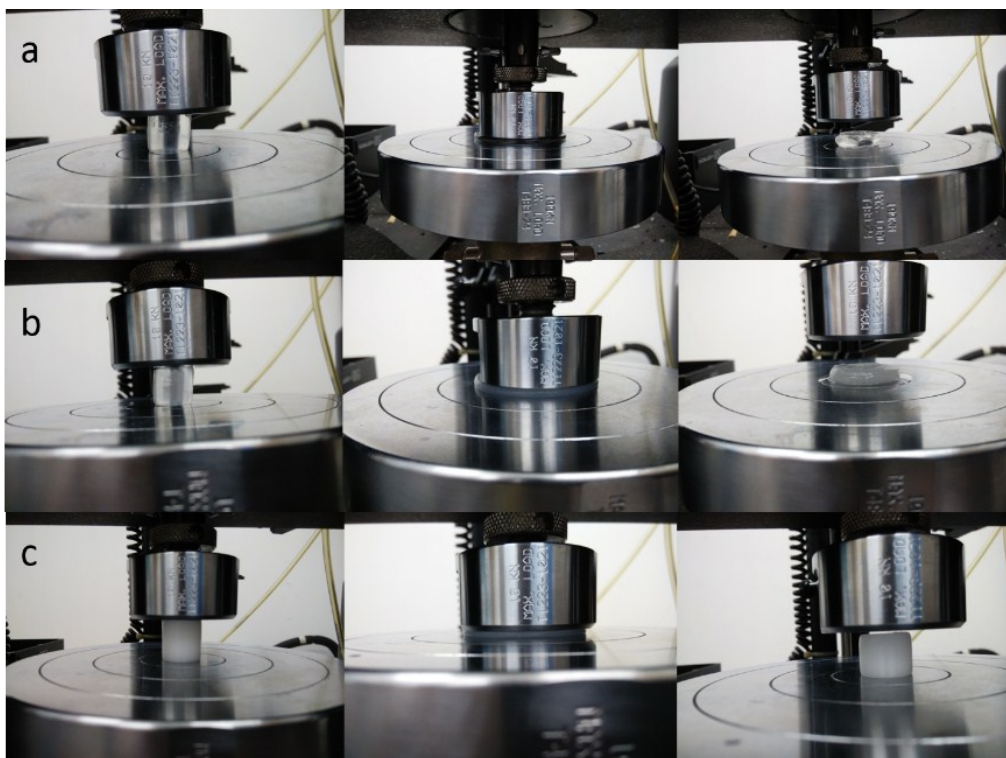

**Fig. S4** Compression test photos: (a) HAPAM (b) HAPAM/PVA-4 (c) HAPAM/PVA-4-24

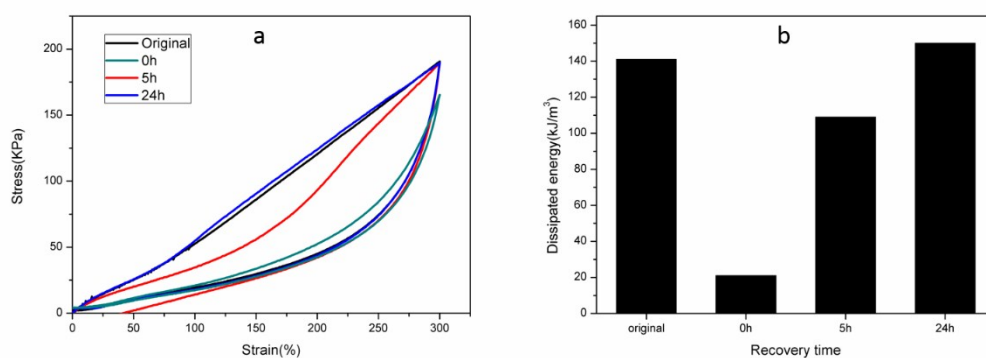

**Fig. S5** (a) Recoverable loading–unloading tensile curves of HAPAM/PVA-6-3 gel at a strain of 300%. (b) Dissipated energies of HAPAM/PVA-6-3 calculated from the hysteresis loops
